# Supplementary material for: Using Deep Neural Networks to Reconstruct Non-uniformly Sampled NMR Spectra
Source: PubMed Central journal article supplement (PMC6859195; doi:10.1007/s10858-019-00265-1), 2019-07-10
Supplement: 10858_2019_265_MOESM1_ESM.pdf [file 10858_2019_265_MOESM1_ESM.pdf]

## **Supporting Material for**

# **Using Deep Neural Networks to reconstruct non-uniformly sampled NMR spectra**

D. Flemming Hansen

Institute of Structural and Molecular Biology, Division of Biosciences, University College  
London, London, United Kingdom, WC1E 6BT

E-mail: [d.hansen@ucl.ac.uk](mailto:d.hansen@ucl.ac.uk)

**Description of the layers used in the Deep Neural Network:**

The layers used for the deep neural network in Figure 1 consist of:

| Layer name | Operations                                                                                                                                                                                                                                                                                                                                                                                                                                                                                                                                                                                                                                                                                                                             |
|------------|----------------------------------------------------------------------------------------------------------------------------------------------------------------------------------------------------------------------------------------------------------------------------------------------------------------------------------------------------------------------------------------------------------------------------------------------------------------------------------------------------------------------------------------------------------------------------------------------------------------------------------------------------------------------------------------------------------------------------------------|
| F          | A flattening layer denoted ‘F’. The flattening layer only re-arranges the data, no calculations are performed, and no parameters are optimised. For a two-dimensional input tensor (a matrix) $\mathbf{x}$ of size $\{2, np\}$ , the flattening layer returns a one-dimensional vector $\mathbf{y}$ of length $2 \times np$ that consists of a concatenation of the rows of $\mathbf{x}$                                                                                                                                                                                                                                                                                                                                               |
| R          | A reshape layer denoted ‘R’. The reshape layer only re-arranges the data, no calculations are performed, and no parameters are optimised. The reshape layer in Figure 1 is used as the reverse of the flattening layer F. Thus, for a one-dimensional input vector $\mathbf{x}$ of length $2 \times np$ the output $\mathbf{y}$ is a two-dimensional tensor (a matrix) of size $\{2, np\}$ .                                                                                                                                                                                                                                                                                                                                           |
| T          | A linear layer with hyperbolic tangent, $\tanh(x)$ , activation function and bias denoted ‘T’. The layer transforms, in a linear manner, an input vector $\mathbf{x}$ of size $n$ into an output vector $\mathbf{y}$ of size $m$ . This layer contains a two-dimensional parameter-tensor, $\mathbf{A}$ , with dimension $\{m, n\}$ and a one-dimensional parameter-vector, $\mathbf{b}$ , of size $m$ . As described in Eqs. 1 and 2, $\mathbf{y} = \{\tanh(z_1), \tanh(z_2), \dots, \tanh(z_m)\}$ , where $\mathbf{z} = \{z_1, z_2, \dots, z_m\}$ and $\mathbf{z} = \mathbf{A}\mathbf{x} + \mathbf{b}$ . Training the neural network involves optimisation of all the $(n+1) \times m$ parameters of $\mathbf{A}$ and $\mathbf{b}$ . |
| $\sigma$   | A linear layer with sigmoidal activation and bias denoted ‘ $\sigma$ ’. This layer is similar to ‘T’, only difference is that a sigmoidal function is used, $\phi(x) = (1 + \exp(-x))^{-1}$ , instead of the hyperbolic tangent.                                                                                                                                                                                                                                                                                                                                                                                                                                                                                                       |
| +          | An elementwise addition layer denoted ‘+’. For two input vectors, $\mathbf{x}$ and $\mathbf{y}$ , of identical length $n$ , the output vector, $\mathbf{z}$ , is calculated as: $\mathbf{z} = \{z_1, z_2, \dots, z_n\} = \{x_1 + y_1, x_2 + y_2, \dots, x_n + y_n\}$ .                                                                                                                                                                                                                                                                                                                                                                                                                                                                 |
| $\times$   | An elementwise multiplication layer denoted ‘ $\times$ ’. For two input vectors, $\mathbf{x}$ and $\mathbf{y}$ , of identical length $n$ , the output vector, $\mathbf{z}$ , is calculated as: $\mathbf{z} = \{z_1, z_2, \dots, z_n\} = \{x_1 * y_1, x_2 * y_2, \dots, x_n * y_n\}$ .                                                                                                                                                                                                                                                                                                                                                                                                                                                  |

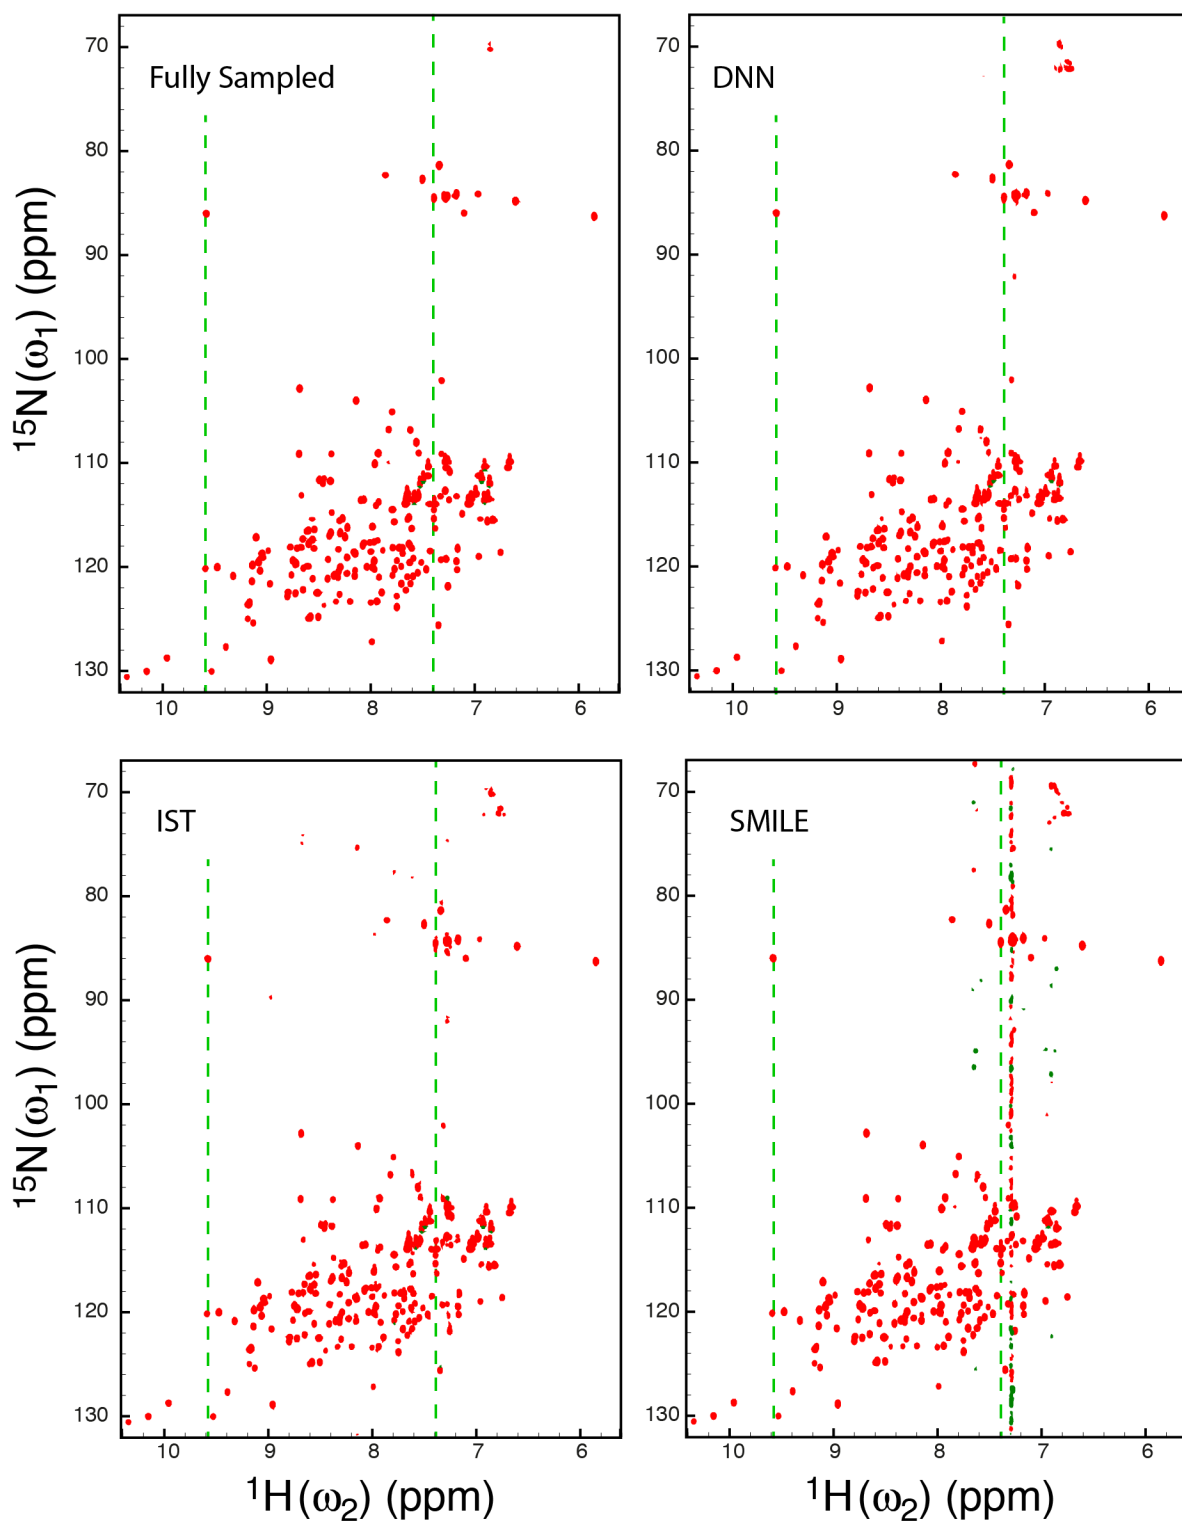

**Fig. S1.** The  $^{15}\text{N}$ - $^1\text{H}$  HSQC spectrum of T4L L99A used to evaluate the performance of the algorithms for reconstruction of sparsely sampled one-dimensional spectra. Shown is, the fully sampled spectrum as well as the spectra reconstructed from a Poisson-gap 12.5% sampling (Table S1), with the three algorithms DNN, IST<sup>1</sup>, and SMILE<sup>2</sup>. The green vertical dashed lines shows where the one-dimensional spectra in Figure 3 are extracted from.

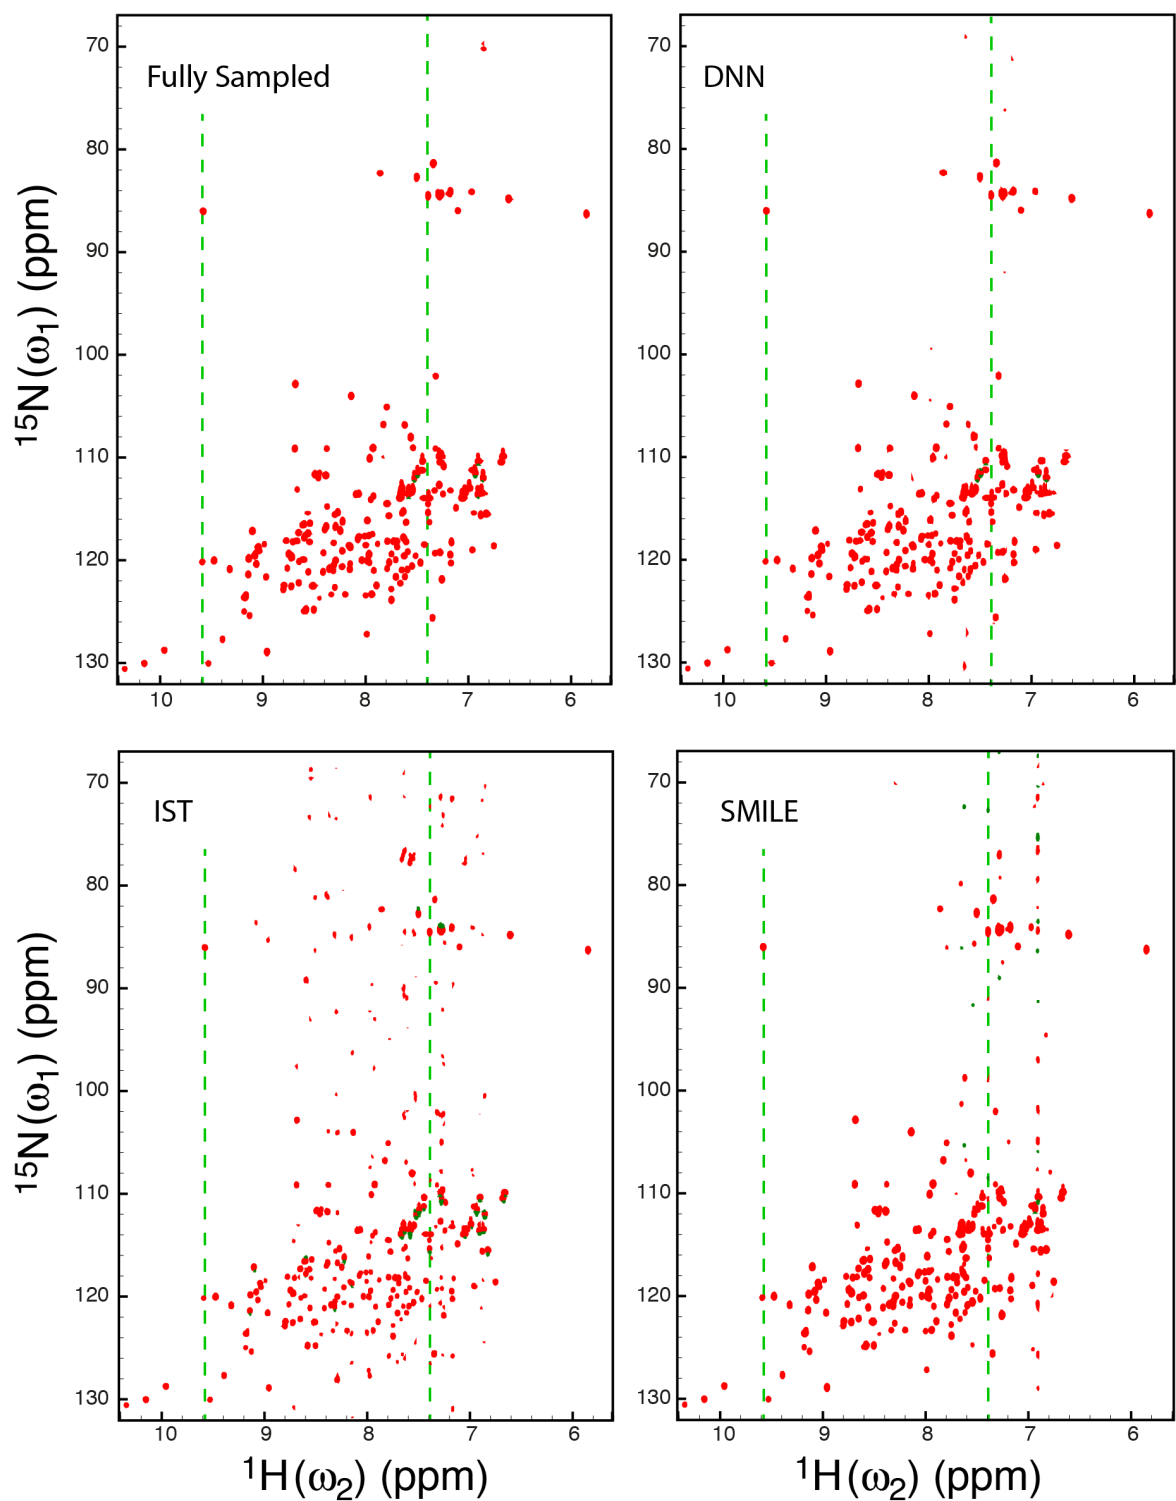

**Fig. S2.** The  $^{15}\text{N}$ - $^1\text{H}$  HSQC spectrum of T4L L99A used to evaluate the performance of the algorithms for reconstruction of sparsely sampled one-dimensional spectra. Shown is, the fully sampled spectrum as well as the spectra reconstructed from a random 12.5% sampling (Table S1), with the three algorithms DNN, IST<sup>1</sup>, and SMILE<sup>2</sup>. The green vertical dashed lines shows where the one-dimensional spectra in Figure 3 are extracted from.

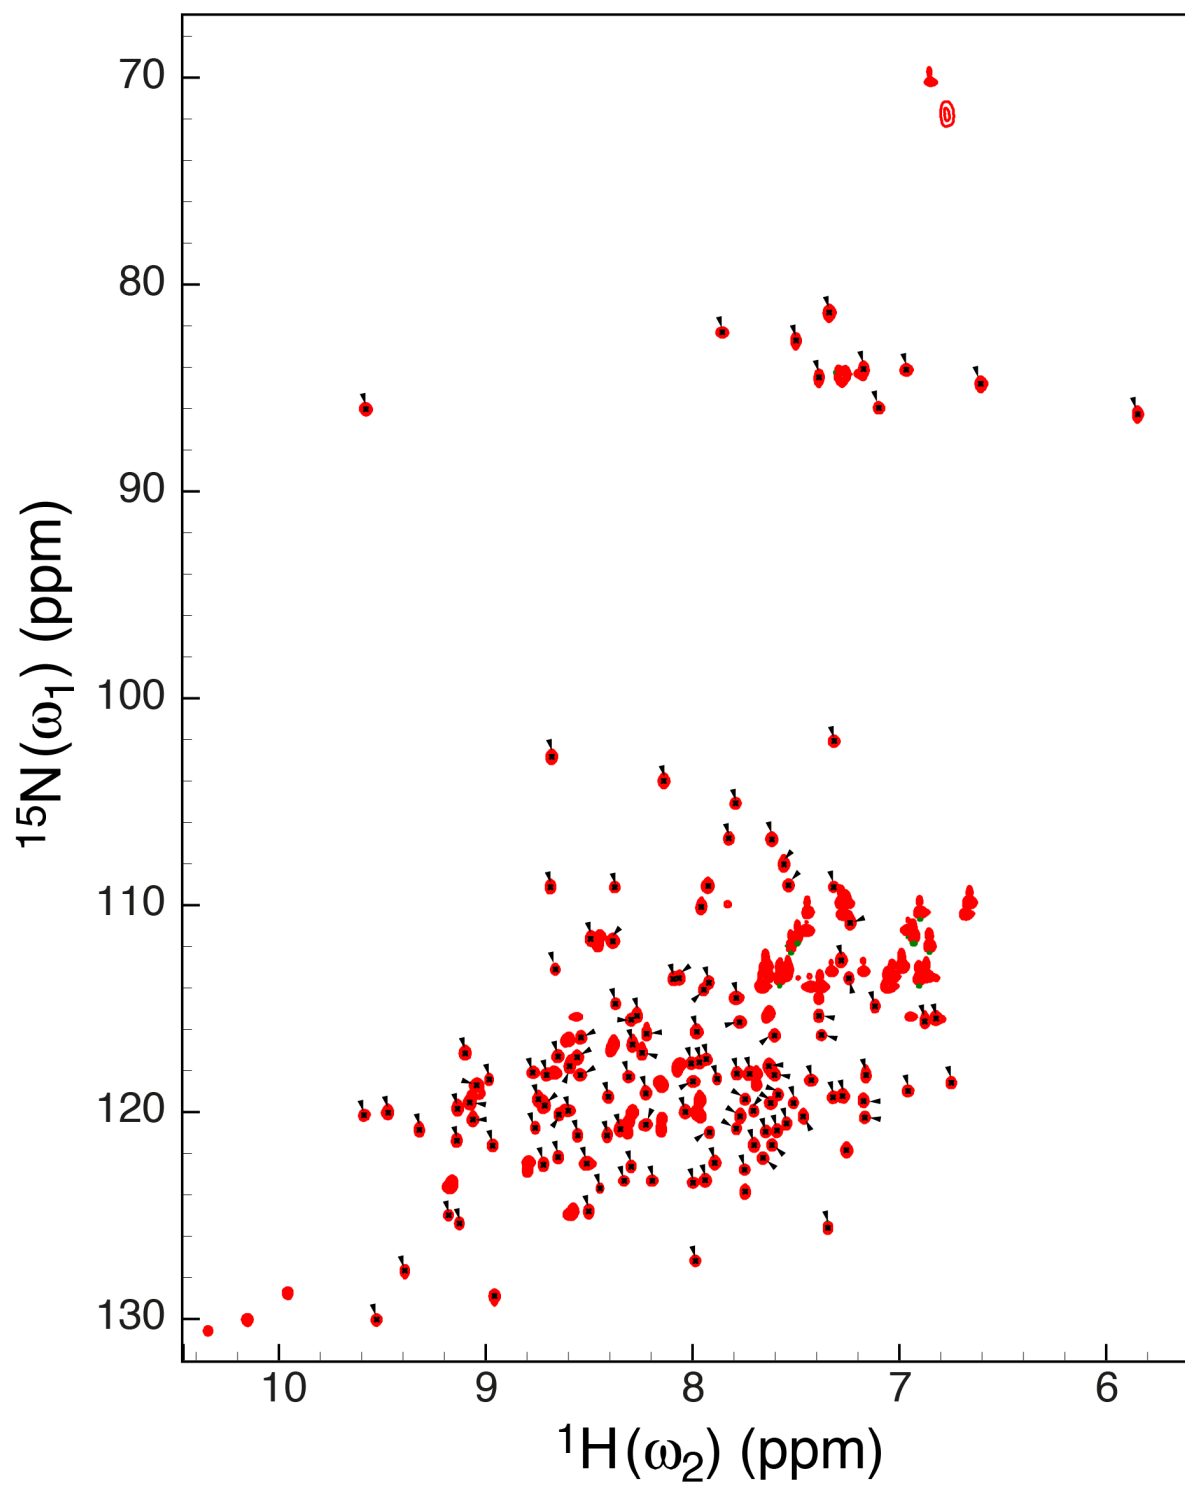

**Fig. S3.**  $^{15}\text{N}$ - $^1\text{H}$  HSQC correlation spectrum of T4L L99A. Peaks that are not overlapped and used for comparison of intensities, Figure 4 and 5, are shown with black marks.

**Table S1.** Sampling schedules

| 12.5% random sampling <sup>a)</sup> |     |     | 12.5% Poisson-gap <sup>b)</sup> |     |     | 18.8% Poisson-gap <sup>b)</sup> |     |     |
|-------------------------------------|-----|-----|---------------------------------|-----|-----|---------------------------------|-----|-----|
| <b>0</b>                            | 0   | 0   | <b>0</b>                        | 0   | 0   | 0                               | 0   | 0   |
| <b>12</b>                           | 11  | 4   | <b>2</b>                        | 2   | 1   | 1                               | 1   | 1   |
| <b>18</b>                           | 16  | 9   | <b>3</b>                        | 3   | 2   | 3                               | 2   | 2   |
| <b>26</b>                           | 21  | 19  | <b>5</b>                        | 7   | 3   | 4                               | 3   | 5   |
| <b>28</b>                           | 31  | 36  | <b>8</b>                        | 9   | 5   | 5                               | 4   | 7   |
| <b>45</b>                           | 34  | 42  | <b>11</b>                       | 12  | 7   | 6                               | 5   | 8   |
| <b>56</b>                           | 36  | 47  | <b>13</b>                       | 17  | 10  | 8                               | 6   | 9   |
| <b>77</b>                           | 41  | 48  | <b>20</b>                       | 24  | 14  | 9                               | 9   | 11  |
| <b>80</b>                           | 64  | 56  | <b>30</b>                       | 28  | 17  | 11                              | 12  | 12  |
| <b>105</b>                          | 76  | 75  | <b>38</b>                       | 34  | 20  | 13                              | 14  | 15  |
| <b>106</b>                          | 77  | 83  | <b>43</b>                       | 44  | 28  | 15                              | 16  | 17  |
| <b>114</b>                          | 88  | 98  | <b>55</b>                       | 54  | 35  | 17                              | 20  | 23  |
| <b>121</b>                          | 89  | 100 | <b>66</b>                       | 66  | 41  | 22                              | 26  | 29  |
| <b>132</b>                          | 93  | 116 | <b>78</b>                       | 81  | 52  | 26                              | 32  | 33  |
| <b>133</b>                          | 111 | 117 | <b>93</b>                       | 97  | 56  | 31                              | 38  | 36  |
| <b>140</b>                          | 119 | 119 | <b>115</b>                      | 105 | 72  | 33                              | 43  | 40  |
| <b>142</b>                          | 120 | 121 | <b>134</b>                      | 120 | 89  | 40                              | 50  | 42  |
| <b>143</b>                          | 129 | 132 | <b>151</b>                      | 143 | 107 | 47                              | 59  | 44  |
| <b>154</b>                          | 149 | 136 | <b>165</b>                      | 161 | 131 | 53                              | 65  | 50  |
| <b>160</b>                          | 156 | 137 | <b>181</b>                      | 179 | 149 | 57                              | 71  | 58  |
| <b>178</b>                          | 166 | 138 | <b>192</b>                      | 192 | 168 | 61                              | 81  | 68  |
| <b>185</b>                          | 173 | 139 | <b>200</b>                      | 200 | 192 | 66                              | 91  | 74  |
| <b>193</b>                          | 180 | 140 | <b>212</b>                      | 209 | 202 | 73                              | 100 | 82  |
| <b>197</b>                          | 184 | 143 | <b>227</b>                      | 220 | 217 | 84                              | 110 | 87  |
| <b>211</b>                          | 188 | 154 | <b>234</b>                      | 227 | 229 | 98                              | 118 | 96  |
| <b>221</b>                          | 195 | 159 | <b>239</b>                      | 231 | 236 | 106                             | 129 | 103 |
| <b>224</b>                          | 196 | 185 | <b>243</b>                      | 238 | 238 | 119                             | 143 | 114 |
| <b>233</b>                          | 215 | 196 | <b>246</b>                      | 242 | 242 | 130                             | 154 | 122 |
| <b>240</b>                          | 218 | 205 | <b>251</b>                      | 247 | 249 | 148                             | 168 | 128 |
| <b>246</b>                          | 220 | 239 | <b>252</b>                      | 250 | 251 | 163                             | 175 | 147 |
| <b>250</b>                          | 232 | 243 | <b>254</b>                      | 252 | 252 | 173                             | 186 | 161 |
| <b>251</b>                          | 254 | 250 | <b>255</b>                      | 255 | 254 | 188                             | 194 | 174 |
|                                     |     |     |                                 |     |     | 199                             | 204 | 185 |
|                                     |     |     |                                 |     |     | 206                             | 212 | 196 |
|                                     |     |     |                                 |     |     | 211                             | 217 | 203 |
|                                     |     |     |                                 |     |     | 220                             | 224 | 210 |
|                                     |     |     |                                 |     |     | 227                             | 230 | 218 |
|                                     |     |     |                                 |     |     | 234                             | 234 | 224 |
|                                     |     |     |                                 |     |     | 237                             | 236 | 229 |
|                                     |     |     |                                 |     |     | 239                             | 238 | 235 |
|                                     |     |     |                                 |     |     | 241                             | 241 | 237 |
|                                     |     |     |                                 |     |     | 242                             | 243 | 240 |
|                                     |     |     |                                 |     |     | 247                             | 244 | 243 |
|                                     |     |     |                                 |     |     | 249                             | 247 | 246 |
|                                     |     |     |                                 |     |     | 251                             | 249 | 249 |
|                                     |     |     |                                 |     |     | 252                             | 251 | 251 |
|                                     |     |     |                                 |     |     | 253                             | 253 | 253 |
|                                     |     |     |                                 |     |     | 255                             | 255 | 255 |

**a)** Generated using the random function within the python module *numpy*. First schedule, in bold, is used for data in Figure 3c,d and Figure S2. **b)** Generated with the programme provided as a part of the *istHMS*<sup>1</sup> package using the Knuth algorithm and random seeds of 31415926, 31415925, 31415920, respectively. First schedule, in bold, is used for data in Figures 2, 3a, 3b, and S1.

## Supporting References

1. Hyberts, S. G., Milbradt, A. G., Wagner, A. B., Arthanari, H. & Wagner, G. Application of iterative soft thresholding for fast reconstruction of NMR data non-uniformly sampled with multidimensional Poisson Gap scheduling. *J. Biomol. NMR* **52**, 315–327 (2012).
2. Ying, J., Delaglio, F., Torchia, D. A. & Bax, A. Sparse multidimensional iterative lineshape-enhanced (SMILE) reconstruction of both non-uniformly sampled and conventional NMR data. *J. Biomol. NMR* **68**, 101–118 (2017).
